# Supplementary material for: Beyond Information Provision: Analysis of the Roles of Structure and Agency in COVID-19 Vaccine Confidence in Ethnic Minority Communities
Source: MDPI journal article supplement (doi:10.3390/ijerph20217008), 2023-11-01
Supplement: s1 [file s1]

## **A qualitative study of reasons for reduced Covid-19 vaccine confidence in low uptake ethnic groups in London**

### **[Before turning on the recorder]**

- Introduce myself
- Go through the participant information sheet
- Go through consent form & sign
- Explain that I'm going to note down things I want to come back to
- Reiterate there's no right or wrong answer etc.

### **Introductions**

- Can you tell me a bit about yourself?
  - What is your role
- Can you tell me about your work during Covid
  - Examples of community engagement
  - Which communities
  - Responses
  - Success/challenges

### **Concerns about vaccine**

- Which concerns have you come across?
  - What other factors have influenced views?
  - Gender
  - Age
  - Ethnicity
  - Religion
  - Where you live/work
  - Experience of healthcare
  - Family/friends
  - Ability to travel/vaccine passports
- Does having Covid influence views?
- How have views changed over time?
- Impact of recent policy changes

### **Comparison with influenza vaccine**

- Do you have any experience of working in other vaccine programmes?
- How does this compare?

### **Recommendations**

- Who needs to give info about vaccines in future?
  - Government
  - NHS
  - Local GP/nurse/pharmacist
  - Friends
  - Family

- Members of your community
- How can we make it easier for people to access trusted information?
  - Working with community groups
  - Online information
  - Government messaging

Close

That's all I have to ask you but do you have any questions for me at all?

Thank you for your time
